# Supplementary material
Source: PubMed Central journal article supplement (PMC4168533)
Supplement: gf522de_10-1055-s-0032-1315347.pdf [file gf522de_10-1055-s-0032-1315347.pdf]

# Die Entwicklung einer modifizierten Technik für eine Sectio caesarea

## New Technique for Caesarean Section

### Autoren

T. R. Vejnović<sup>1</sup>, S. D. Costa<sup>2</sup>, A. Ignatov<sup>2</sup>

### Institute

<sup>1</sup> Geburtshilfe und perinatologische Abteilung, Universitätsklinikum Novi Sad, Serbien

<sup>2</sup> Universitätsfrauenklinik Magdeburg, Magdeburg, Deutschland

### Schlüsselwörter

- Sectio caesarea
- Sectio-Modifikation
- Vejnović-Methode

### Key words

- Caesarean section
- section modification
- Vejnović method

### Zusammenfassung

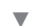

Die Sectio caesarea ist weltweit eine der am häufigsten durchgeführten Operationen, und ihr Anteil in Perinatalzentren in Deutschland beträgt über 30%. In den letzten Jahren wurde die Technik der Sectio caesarea vereinfacht, was zu einer niedrigeren postoperativen Morbidität führte. Weiterhin bestehende Probleme aller Sectio-Techniken sind hohe intraoperative Blutverluste, die Gefahr der Verletzung des Kindes bei der Uterotomie und die spätere Nahtdehiszenz im Bereich der Uterotomienarbe. Wir stellen eine Modifikation der am häufigsten durchgeführten Methode nach Misgav-Ladach vor. Die Hautinzision wird in den Hautlinien durchgeführt und intraoperativ entsprechend der kindlichen Kopfgröße erweitert. Nach stumpfer Uterotomie wird der distale Uterotomierand über den führenden Teil des Neugeborenen geschoben und dieser durch leichten Druck geboren. Der Verschluss der Uterotomie erfolgt durch 2 fortlaufende Nähte, deren Verknotung zu einem kurzen, doppelschichtigen Verschluss führt. Bei der Hautnaht werden die beiden Enden offen, im Sinne einer natürlichen Drainage belassen. Die Erfahrungen an den Universitäts-Frauenkliniken Novi Sad und Magdeburg zeigen eine deutliche Verkürzung der Operationszeit mit geringem Blutverlust und verkürztem stationären Aufenthalt, kombiniert mit einer hohen Zufriedenheit der Patientinnen.

### Abstract

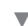

Caesarean section is one of the most common operations worldwide and more than 30% of procedures in perinatal centres in Germany are caesarean sections. In the last few years the technique used for caesarean sections has been simplified, resulting in a lower postoperative morbidity. But persistent problems associated with all caesarean section techniques include high intraoperative loss of blood, the risk of injury to the child during uterotomy and postoperative wound dehiscence of the uterine scar. We present here a modification of the most common Misgav-Ladach method. The initial skin incision is done along the natural skin folds and is extended intraoperatively depending on the circumference of the baby's head. After blunt expansion of the uterine incision using an anatomical forceps, the distal uterine wall is pushed behind the baby's head. The baby's head is rotated into the occipito-anterior or posterior position and delivery occurs through the application of gentle pressure on the uterine fundus. Closure of the uterotomy is done using 2 continuous sutures, which are then knotted together resulting in a short double-layer closure. The two ends of the skin suture are left open to allow for natural drainage. Our experience at the University Gynaecological Hospitals in Novi Sad and Magdeburg has shown that this modification is associated with shorter operating times, minimal blood loss and shorter in-hospital stay of patients as well as high rates of patient satisfaction.

eingereicht 26.12.2011

revidiert 1.8.2012

akzeptiert 1.8.2012

### Bibliografie

DOI <http://dx.doi.org/>

10.1055/s-0032-1315347

Geburtsh Frauenheilk 2012; 72:

1–7 © Georg Thieme Verlag KG

Stuttgart · New York ·

ISSN 0016-5751

### Korrespondenzadresse

**Dr. Atanas Ignatov**

Universitätsfrauenklinik

Magdeburg

Gerhart-Hauptmann Straße 135

39108 Magdeburg

atanas.ignatov@med.ovgu.de

### Einleitung

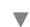

Die Sectio caesarea ist weltweit eine der am häufigsten durchgeführten Operationen der Frau. Bis Mitte des letzten Jahrhunderts überstieg die Sectio-Rate in Europa selten die Grenze von 3–5% [1]. Gegenwärtig wird etwa jede 3. Entbin-

dung (31,3% im Durchschnitt) in den deutschen Krankenhäusern per Kaiserschnitt durchgeführt [2–4].

Die Zunahme der Sectio-Rate wird auf erweiterte Indikationen, Zunahme der Frühgeburtlichkeit sowie Zunahme juristischer Auseinandersetzungen zurückgeführt. Zu den wichtigsten Indikatio-

nen für eine Sectio caesarea gehören die Beckenendlage, Geburten mit protrahiertem Geburtsverlauf einschließlich des Geburtsstillstands, die drohende intrauterine Hypoxie und der Zustand nach Sectio [5–8]. In den letzten Jahren scheint auch die Rate an Wunsch-Sectios zuzunehmen, wobei es hierzu keine zuverlässigen Statistiken gibt. Es ist anzunehmen, dass auch die Weiterentwicklung der Sectio-Technik zur Senkung der mütterlichen und fetalen Morbidität und Mortalität beigetragen hat [9, 10]. In den letzten Jahrzehnten wurde die „klassische“ Sectio nach Pfannenstiel zunächst durch die Sectio nach Joel-Cohen und die „sanfte Sectio“ nach Misgav-Ladach abgelöst [11–13]. Die Veränderungen der Operationstechniken führten zu einer Verkürzung der Operationszeit, geringerem Blutverlust, geringerer Traumatisierung des Gewebes und eine größere Zufriedenheit der Patientinnen [14–16].

Weitere Modifikationen der Sectio-caesarea-Methode wurden anfangs 2000 an der Universität Novi Sad (Serbien) entwickelt und mit der klassischen Sectio-Methode retrospektiv verglichen [17]. Bei 600 Patientinnen wurde eine Sectio caesarea nach Doerfler [18] durchgeführt, und 5648 Patientinnen wurden mit der modifizierten Methode operiert. Der Vergleich mit der klassischen Sectio-Methode ergab, dass durch die modifizierte Sectio-Methode der Blutverlust und die postoperativen Schmerzen reduziert (342 vs. 495 ml) und die Operationszeit verkürzt (durchschnittlich 12 vs. 40 min) werden konnten. Der stationäre Aufenthalt konnte deutlich verkürzt werden (3,3 vs. 6,7 Tage) [17]. Insgesamt war die intra- und postoperative Morbidität signifikant reduziert.

Im Folgenden wird die Technik dieser Methode beschrieben, sowie die ersten Daten eines prospektiven Vergleichs zwischen der „klassischen“ Methode der Sectio caesarea mit der modifizierten Methode dargestellt.

## Patienten und Methoden

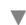

### Studiendesign

Die prospektive Studie wurde zwischen 1.5.2008 und 1.3.2009 in der Abteilung für Gynäkologie und Geburtshilfe an dem klinischen Zentrum Vojvodina in Novi Sad, Serbien, durchgeführt. Einschlusskriterien waren Primiparität und eine geplante (elektive) Sectio sowie die unterschriebene Einverständniserklärung der Patientin nach ausführlicher Aufklärung. Die Patientinnen wurden mittels computergestützten Randomisierens einer der beiden Gruppen zugeordnet. In der Studie wurden 122 Patienten untersucht, bei 72 (59,1%) wurde die neue Kaiserschnittmethode (Gruppe A) und bei 50 (40,9%) die klassische Sectio-Methode nach Doerfler (Gruppe B) durchgeführt. Ausschlusskriterien waren die Not-Sectio aus verschiedenen Gründen, ein fehlendes Einverständnis der Patientin zur Teilnahme an der Studie sowie inkomplette Follow-up-Daten.

Der Operateur erfuhr erst kurz vor der Operation, welche Technik anzuwenden war. Für die Patientin wurde die Studie am Entlassungstag entblindet. Die Operationen wurden in lokaler oder spinaler Anästhesie durchgeführt. Es wurden die Operationszeit, die Hospitalisierung und der Blutverlust evaluiert. Die Operationszeit wurde zwischen dem Beginn der Operation durch den Hautschnitt und dem Ende der Operation, also der Hautnaht gemessen. Der Blutverlust wurde durch einen Sauger bestimmt in dem man gezielt nur das Blut und nicht das Fruchtwasser absaugte. Indirekt wurde der Blutverlust auch durch die Bestimmung des prä- und postoperativen Hb-Wertes mitbestimmt. In der Studie

wurden 10 Operateure involviert, die Hälfte operierte die Frauen nach der klassischen Methode und die andere Hälfte nach der modifizierten Technik. Alle Operateure haben vor der Studie mindestens 30 Sectiones nach der entsprechenden Methode durchgeführt. Die Anzahl der Patientinnen von beiden Gruppen, die ein Operateur operiert hat, war relativ ausgeglichen und gleich verteilt. Jeder Operateur hatte mindestens 10 Patientinnen operiert.

Die postoperative klinische Kontrolle erfolgte regelmäßig, die laborchemischen Untersuchungen bei Bedarf. Postoperativ wurden die Narbenlänge, die lokale Rötung, die Schwellung, die Serom- bzw. Hämatombildung und die Schmerzen im Narbenbereich evaluiert. Die Patientenzufriedenheit wurde ebenfalls untersucht.

## Vergleich der klassischen Sectio caesarea mit der neuen Operationsmethode

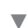

### Beschreibung der klassischen Operationstechnik

Die Hautinzision bei der klassischen Sectio-Technik erfolgt durch einen Pfannenstiel-Querschnitt 2 cm oberhalb der Symphyse, das subkutane Fettgewebe und die Fascia abdominalis werden ebenfalls mit dem Skalpell scharf durchtrennt und die Aponeurose der queren Bauchmuskulatur wird von der geraden Bauchmuskulatur abgelöst. Dann erfolgt in der Mitte das Abschieben der Rektusmuskulatur mit darauffolgender scharfer Eröffnung des Peritoneums in kraniokaudaler Richtung. Das Blasenperitoneum wird von der Uterusvorderwand durchtrennt und in kaudale Richtung abgeschoben. Bei der klassischen Sectio-Methode wird die Uteruswand komplett mit dem Skalpell durchtrennt und der Schnitt wird manuell, bogenförmig und quer erweitert. Die manuelle Kindsentwicklung erfolgt nach Eröffnung der Blase. Nach Bestimmung des kindlichen pH-Wertes erfolgt die manuelle Entfernung der Plazenta. Beim Verdacht auf Plazentaresten wird eine Cavumkürettage durchgeführt. Je nach Muttermundweite kann eine digitale Zervixdilatation oder eine Dilatation mit Hegar-Stiften auf ca. 3 cm durchgeführt werden. Die Uterusnaht erfolgt durch eine fortlaufende oder eine Einzelknopfnahreihe. Das Peritoneum und die Muskulatur werden durch fortlaufende bzw. durch Einzelknopfnähte vernäht. Die Faszie wird wie üblich durch eine fortlaufende Naht verschlossen. Im Anschluss erfolgt die Versorgung der Haut durch eine intrakutane fortlaufende Naht.

### Beschreibung der neuen Operationstechnik

#### Eröffnung des Abdomens (Abdominotomie)

Die Stelle der Hautinzision wird durch das sanfte Herunterdrücken der Bauchdecke nach kaudal markiert. Die Inzision erfolgt entlang der infolgedessen gebildeten Hautfalte (● **Abb. 1 a**), ca. 5 cm oberhalb der Symphyse. Die Länge der Inzision beträgt zunächst ca. 6–7 cm und sollte im weiteren Verlauf der Operation dem Kopfumfang (frontookzipitalen Diameter) bzw. dem führenden Steiß angepasst werden. Dieses gelingt mühelos, wenn die Hautinzision streng in den Hautlinien durchgeführt wird. Die Fascia abdominalis wird dann mit dem Skalpell scharf oberhalb der Pyramidalmuskeln durchtrennt (● **Abb. 1 b**). Durch den Zug an der Faszie wird das Abdomen im Bereich der Linea alba scharf eröffnet, und im Anschluss wird der Zugang durch vertikalen und transversalen Zug stumpf erweitert.

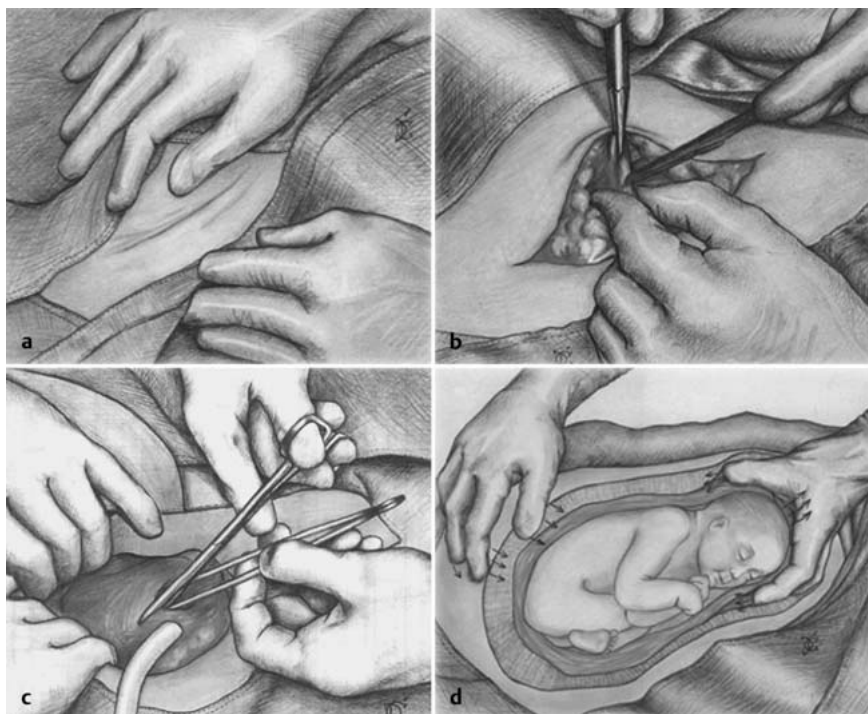

**Abb. 1 a bis d** Darstellung der Hautinzision, Uterotomie und Kindsentwicklung.

- a** Die Hautinzision wird streng entlang der Hautlinien durchgeführt und  
**b** die Faszie oberhalb der Pyramidalmuskeln durchtrennt.  
**c** Durchführung der Uterotomie mithilfe einer stumpfen Pinzette und Schere.  
**d** Das Kind wird durch Erweiterung und kraniales Abschieben der Uteruswunde durch die Fingerspitzen (Pfeile nach kranial), wie einen „Kragen“ über seinen Kopf, kombiniert mit dosiertem Druck im Fundusbereich „geboren“ (aus [12]). Durch den Fundusdruck wird der Kopf des Kindes nach kaudal getrieben (s. Pfeile).

### Uterotomie

Nach Inzision (ca. 2 cm) der Uterusserosa 2 cm oberhalb der Blasenumschlagsfalte, in Höhe des isthmikozervikalen Segments wird eine lange anatomische Pinzette durch leichten Druck schräg, in einem Winkel von ca. 30° in das Cavum uteri, vorbei am führenden Teil, eingeführt (◉ **Abb. 1 c**). Mit der Schere wird zwischen den beiden Schenkeln der Pinzette die Uteruswand auf einer Länge von 5–6 cm durchtrennt und mit den Fingern stumpf erweitert.

### Kindsentwicklung

Zunächst wird der untere Pol des führenden kindlichen Teiles durch Luxation in die Uterusöffnung sichtbar. In der 2. Phase wird der führende Teil „geboren“, indem man die obere (dann „vordere“) und untere (danach „hintere“) Uteruswunde mit dem Fingern der linken Hand um den führenden Teil nach kranial abschiebt (◉ **Abb. 1 d**). Die „Geburt“ wird durch Druck im Fundusbereich unterstützt. Dabei kann die Uterotomie und gleich danach die Hautinzision dem fetalen Kopfdurchmesser stumpf, mit den Fingern, vergrößert, d. h. angepasst werden. Das Kind wird mit der rechten Hand des Operateurs bzw. des Assistenten aus dem Uterus durch einen dosierten Druck auf den Fundus uteri „ausgepresst“. Während der Kindsentwicklung werden keinerlei Wundhaken (d. h. keine Fritsch'schen oder Roux-Haken) benötigt, um die Elastizität des Gewebes auszunutzen.

Nach Kindsgeburt und Abnabelung wird ein Nabelstück für die pH-Bestimmung zwischen 2 Klemmen entfernt und die Plazenta durch Cord Traction (Zug durch die verbleibende Pean-Klemme) und Druck im Fundusbereich entfernt. Bei kompletter Plazenta ist die digitale Austastung des Cavum uteri ausreichend, beim Verdacht auf Plazentaresten wird eine Cavumkürettage mit einer stumpfen, großen Kürette durchgeführt. Je nach Muttermundweite kann eine digitale Zervixdilatation oder eine Dilatation mit Hegar-Stiften auf ca. 3 cm durchgeführt werden.

### Uterusnaht

Die Uteruswand wird durch 2 Nähte von der Mitte der Uterotomie ausgehend geschlossen (◉ **Abb. 2**). Der 1. Stich erfolgt 3–4 cm medial des anatomischen Wundwinkels. Durch den Zug an dem Faden wird die Wunddecke optimal dargestellt und die Wunde durch 1 oder 2 Durchstiche versorgt. Mit demselben Faden werden dann noch 2–4 fortlaufende Stiche durchgeführt und die Fadenenden geknotet und lang belassen (◉ **Abb. 2 a**). Mit einem 2. Faden wird die kontralaterale Seite analog verschlossen (◉ **Abb. 2 b**). Die Mitte der Uterusinzision, die noch eröffnet ist, wird dann mit einem der beiden Fäden durch fortlaufende Naht komplett verschlossen (◉ **Abb. 2 c**). Im Anschluss wird die Wundfläche durch abwechselnde Verknötung der verschiedenen Fadenenden weiter verkleinert und versenkt (◉ **Abb. 2 d**).

### Versorgung des Peritoneums und der Faszie

Nach Inspektion der beiden Adnexe wird das Peritoneum auf die Uterusvorderwand gelegt, auf eine Naht des Peritoneums wird verzichtet. Die Faszie wird wie üblich durch eine fortlaufende Naht verschlossen.

### Hautnaht

Die Haut wird durch intrakutane fortlaufende Naht versorgt, die ca. 2 cm medial von den Wunddecken beginnt und endet (◉ **Abb. 3**). Diese Modifikation ermöglicht eine natürliche Drainage der Wundsekretion und Blutung. Nach Desinfektion wird eine große Kompresse auf die Wunde gelegt, die typischerweise trotz Bluttrockenheit des subkutanen Fettgewebes am Ende der Operation nach 2–3 Stunden durchgeblutet ist und erneuert werden muss. Der Faden wird am 8.–10. postoperativen Tag gezogen.

### Benötigte Instrumente

Ein nicht unbedeutender Aspekt der modifizierten Sectio caesarea ist die niedrige Anzahl der verwendeten Operationsinstrumente, die zu einer erheblichen Kostensenkung führt. Benötigt werden: Skalpell, Kocher-Klemme, 2 Pean-Klemmen, lange anatomo-

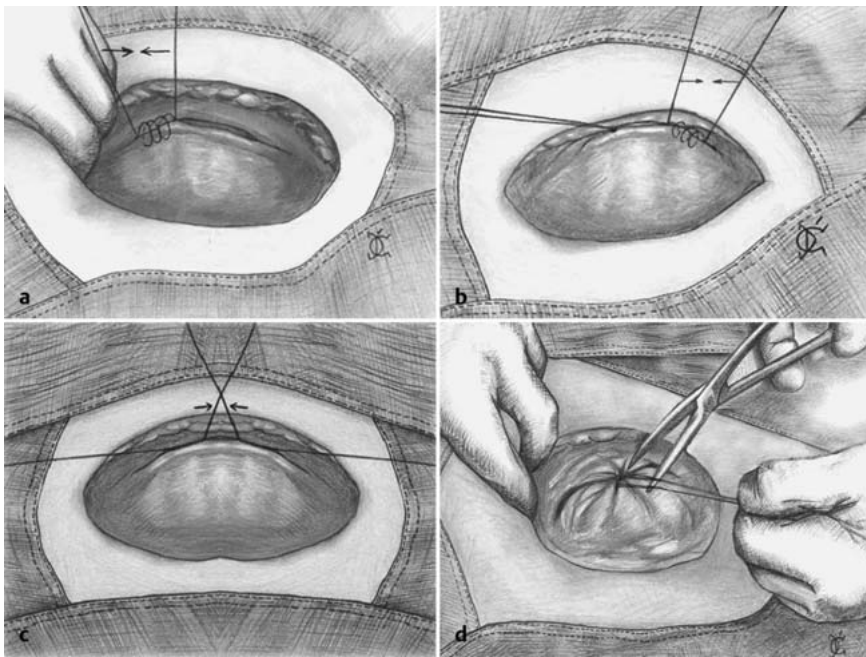

**Abb. 2 a bis d** Technik der Uterusnaht. Die Uterusnaht erfolgt durch 2 Nähte von beiden Seiten ausgehend.

**a** Der 1. Stich erfolgt etwas medial der anatomischen Wundecke. Mit demselben Faden werden noch 2–4 fortlaufende Stiche durchgeführt und die Fadenenden geknotet.

**b** Analog wird mit einem 2. Faden von der anderen Seite ausgehend die Uteruswand verschlossen.

**c** Beide Nähte werden in der Mitte geknotet und **d** im Anschluss wird die Naht durch Verknötung der verschiedenen Fadenenden versenkt (aus [12]).

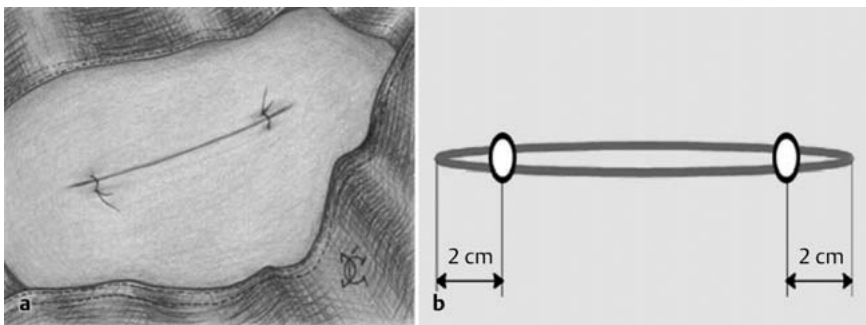

**Abb. 3 a und b** Hautnaht.

**a** Die Haut wird durch eine fortlaufende Naht geschlossen wobei die beiden Enden ca. 2 cm offen gelassen werden.

**b** Schematische Darstellung der Hautnaht (aus [12]).

mische Pinzette, lange gerade Schere, Nadelhalter. Bei gegebener Indikation können geburtshilfliche Hegar-Stifte für die Zervixdilatation bzw. eine große, stumpfe Kürette für die Abrasio des Cavum uteri Verwendung finden. Die Methodik beider Sectio-Techniken ist in der **Tab. 1** dargestellt.

### Schmerzscore

Die subjektive Schmerzempfindung wurde durch eine visuelle Analogskala (visual analog pain scale) evaluiert. Die Schmerzintensität wurde täglich durch die Patientin eingegeben, wobei 0 als kein Schmerz bezeichnet wurde und 9 als unerträglicher Schmerz. Die Schmerzintensität wurde durch einen Score erfasst: 0 keine Schmerzen; 1–3 schwache Schmerzen; 4–6 mittelstarke Schmerzen; 7–9 sehr starke Schmerzen.

### Statistik

Die Daten wurden aus dem Fragebogen, der durch die Patientin ausgefüllt wurde, und aus den medizinischen Unterlagen (Operationsprotokoll, postoperative Überwachung etc.) gesammelt. Sie wurden dann entsprechend kodiert und an eine speziell dafür entwickelte Online-Datenbank übermittelt. Im Anschluss erfolgte eine zusätzliche Verifikation und Validierung des Algorithmus (Logic Control). Für die statistische Auswertung dieser Daten wurden grundlegende deskriptive Methoden verwendet. Es wur-

den die absoluten und relativen Zahlen, der Mittelwert, die Standardabweichung und die Wertebereiche berechnet.

Die Statistik wurde durch SPSS 18 (SPSS, Chicago, IL, USA) ermittelt. Die Korrelation zwischen der Sectio-Methode und den klinischen Parametern wurden mittels  $\chi^2$ -Test und Fisher's Exact Test untersucht. Die unabhängigen Stichproben wurden mit dem nicht parametrischen Test nach Mann-Whitney (U-Test) untersucht. Als signifikant wurden Werte ab  $< 0,05$  betrachtet.

### Ergebnisse

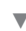

Das mediane Alter war in beiden Gruppen ausgeglichen und betrug 29,6 Jahre für die Gruppe A und 28,7 für die Gruppe B (**Tab. 2**). Es gab auch keine statistisch signifikanten Unterschiede zwischen den beiden Gruppen bez. des Body-Mass-Indexes (BMI) bzw. Nebenerkrankungen (z.B. Diabetes mellitus, präoperative Anämie usw.). Der Vergleich mit der klassischen Sectio-Methode ergab, dass durch die modifizierte Sectio-Methode der stationäre Aufenthalt und vor allem die postoperative Hospitalisierung deutlich verkürzt werden konnten (**Tab. 2**). Der Vergleich zeigt eindeutig eine Verringerung des Blutverlusts ( $p = 0,013$ ) sowie Verkürzung der Operationszeit ( $p < 0,001$ ). Der mediane Blutverlust betrug in der Gruppe A 471 ml und in der Gruppe B 561 ml (**Tab. 2**). Die mediane Operationszeit in der

**Tab. 1** Die Unterschiede zwischen der klassischen und der modifizierten Methode.

| Prozedur                        | Modifikation nach Vejnovic                                                                                                    | klassische Sectio caesarea                                                       |
|---------------------------------|-------------------------------------------------------------------------------------------------------------------------------|----------------------------------------------------------------------------------|
| Hautinzision                    | Joel-Cohen                                                                                                                    | Pfannenstiel                                                                     |
| Inzision des subkutanen Gewebes | in der Mitte über 3 cm                                                                                                        | auf voller Länge                                                                 |
| Inzision der Faszie             | in der Mitte mit minimaler Trennung von der Muskulatur                                                                        | auf voller Länge mit Trennung von der Muskulatur                                 |
| Eröffnung des Peritoneums       | in der Mitte, stumpf, mit minimaler Trennung von der Muskulatur                                                               | auf voller Länge, scharf, Abschieben der Blase                                   |
| Uterotomie                      | oberflächliche Inzision der Uterusserosa (Skalpelli), stumpfes Eingehen mit einer Pinzette, Erweiterung quer mit einer Schere | Inzision durch alle Uterusschichten mit einem Skalpell, Erweiterung quer manuell |
| Plazentaextraktion              | Cord traction                                                                                                                 | manuelle Lösung                                                                  |
| Uterusnaht                      | Versenkung der Naht, kurze Naht                                                                                               | fortlaufend, lange Naht                                                          |
| Peritonealnaht                  | keine                                                                                                                         | fortlaufend                                                                      |
| Muskelnaht                      | keine                                                                                                                         | Einzelknopfnah                                                                   |
| subkutanes Gewebe               | keine                                                                                                                         | Einzelknopfnah                                                                   |
| Hautnaht                        | intrakutan, fortlaufend, seitlich offen                                                                                       | intrakutan, fortlaufend                                                          |

**Tab. 2** Patientenalter, Hospitalisierung, Operationszeit und Blutverlust in beiden Studiengruppen.

| Parameter                     | Gruppe A | Gruppe B | p-Wert  |
|-------------------------------|----------|----------|---------|
|                               | n = 72   | n = 50   |         |
| Alter (Jahre)                 | 29,6     | 28,7     | 0,350   |
| stationärer Aufenthalt (Tage) | 5,56     | 6,08     | 0,018   |
| Operationszeit (Minuten)      | 20,6     | 30,7     | < 0,001 |
| Blutverlust (ml)              | 471      | 561      | 0,013   |

Gruppe A war 10 min kürzer im Vergleich zu der Gruppe B (20,6 vs. 30,7 min).

Weiterhin wurden Narbenlänge, Hautrötung, Serom- und Hämatombildung und Antibiotikagabe in Abhängigkeit von der chirurgischen Technik analysiert. Die Patientinnen, die durch die modifizierte Technik operiert wurden, hatten signifikant weniger Schmerzen in den ersten 4 postoperativen Tagen (● Tab. 3,  $p < 0,001$ ). Die durchschnittliche Inzisionslänge der Haut in der Gruppe A war kürzer (12,6 cm) im Vergleich zu der Narbenlänge in der Kontrollgruppe (14,1 cm). In der Gruppe A wurden weniger häufig Rötungen bzw. Schwellungen als bei den Patientinnen aus der Gruppe B festgestellt (● Tab. 3). Es gab keine Unterschie-

de zwischen beiden Gruppen in Bezug auf Serom- bzw. Hämatombildung, Hautdehiszenz, Entzündung sowie Fieber. In der Gruppe A waren 68 von 72 Patientinnen (94,4%), in der Gruppe B dagegen nur 34 von 50 (68%) mit der Sectio-Narbe sehr zufrieden, und dieser Unterschied war statistisch signifikant ( $p < 0,001$ ).

## Diskussion

Die hier vorgestellte Operationsmethode stellt eine Weiterentwicklung der sogenannten „sanften Sectio-Methode“ nach Misgav-Ladach dar, die bereits als optimierte Methode der Schnittentbindung weltweit breiten Zuspruch erfahren hat [13]. Seit 2000 wurde diese Modifikation an der Universitäts-Frauenklinik Novi Sad in Serbien eingeführt [17] und sie wird seit 3 Jahren mit gutem Erfolg an der Universitäts-Frauenklinik Magdeburg durchgeführt. Die Modifikationen hatten als Ziele, die Gewebetraumatisierung zu reduzieren sowie den Blutverlust und die perioperative Morbidität zu minimieren. Bereits bei der Hautinzision werden die grundlegenden Ziele der modifizierten Methode erkennbar. Bei dem Pfannenstiel-Querschnitt und bei der Misgav-Ladach-Sectio erfolgt die Hautinzision 2 cm oberhalb der Symphyse bzw. 2 cm unterhalb der Linea interspinalis anterior superior [11, 13]. Die Inzision wird auf eine 10–15 cm Länge mit dem Skalpell durchgeführt. Die Hautinzision bei der Vejnovic-Modifikation erfolgt entlang der Hautlinien und ermöglicht eine zunächst relativ kleine Inzision. Sie wird später entsprechend des Umfangs des führenden Kindsteils stumpf erweitert und somit angepasst. So entsteht eine Narbe mit optimaler Länge und in der Regel mit sehr guten kosmetischen Ergebnissen, weil sie in den Hautlinien wenig sichtbar ist.

Die Faszie wird zunächst inzidiert und dann digital (stumpf) erweitert. Sie wird kaudal nicht mehr von den Pyramidalmuskeln getrennt. Auch die Faszienöffnung kann während der Entwicklung des Kindes stumpf an den Kopfumfang angepasst werden. Das Peritoneum wird im Gegensatz zu den „klassischen“ Methoden und analog zur Misgav-Ladach-Technik stumpf und quer eröffnet [11–13]. So werden eventuelle Blasenverletzungen bzw. Gefäßverletzungen mit Blutungen vermieden.

Die wichtigsten Modifikationen betreffen die Uterotomie und deren Verschluss. Bei der Uterotomie wird nach Inzision der Uterusserosa mit einem Skalpell eine lange, anatomische Pinzette durch die Uteruswand in das Cavum uteri eingeführt. Durch das schräge, stumpfe Eingehen mit der Pinzette am führenden kindlichen Teil vorbei können Hautverletzungen vermieden werden. Bei der

**Tab. 3** Komplikationen in beiden Studiengruppen.

| Parameter               | Gruppe A | Gruppe B | p-Wert  |
|-------------------------|----------|----------|---------|
|                         | n = 72   | n = 50   |         |
| Schmerz (subjektiv)     | Score    | Score    | < 0,001 |
| ▶ 1. postoperativer Tag | 2,89     | 4,1      |         |
| ▶ 2. postoperativer Tag | 2,22     | 2,96     |         |
| ▶ 3. postoperativer Tag | 0,71     | 1,18     |         |
| ▶ 4. postoperativer Tag | 0,06     | 0,3      |         |
| Narbenlänge (Haut)      | 12,6 cm  | 14,1 cm  | < 0,001 |
| Fieber                  | 2,8%     | 4%       | 1,000   |
| Wundheilung             |          |          |         |
| ▶ Rötung                | 13,9%    | 32%      | 0,029   |
| ▶ Schwellung            | 2,8%     | 14%      | 0,048   |
| ▶ Dehiszenz             | 1,4%     | 0        | 1,000   |
| ▶ Serom                 | 0%       | 2%       | 0,854   |
| ▶ Hämatom               | 4,2%     | 8%       | 0,617   |

klassischen Sectio wird die Uteruswand komplett mit dem Skalpell durchtrennt, was gelegentlich (z.B. bei fehlendem Fruchtwasser nach Blasensprung oder bei verstärkter Blutung beim Vorliegen einer Vorderwandplazenta) Hautschnittwunden beim Kind verursachen kann. Außerdem wird die Uterotomie bei der Modifikation nach Vejnovic zunächst mit der Schere zwischen den Pinzettenschenkeln eingeschnitten und dann stumpf erweitert. Erst bei der Entwicklung des kindlichen führenden Teiles wird die Uterotomie an dessen Umfang „angepasst“. Der senkrechte Scherenschnitt durch alle Uteruswandschichten ermöglicht eine bessere Adaptation der beiden Uterotomie-Wundränder, was bei dem stumpfen „Auseinanderreißen“ nicht immer optimal gelingt. Der Verschluss der Uteruswand erfolgt ähnlich wie bei der Misgav-Ladach-Methode einschichtig, jedoch mit einigen Unterschieden. So wird die Uterusnaht jeweils ca. 3 cm von beiden Wunddecken entfernt begonnen und nach lateral fortgesetzt. Durch den Zug am Faden gelingt eine optimale Sicht auf die Wunddecken. Die Verknotungen der verschiedenen Fadenden versenken und verkleinern die Uterotomie auf ca. 50%. Das führt zur Vermeidung von zusätzlichen sekundären Nähten bei Blutungen aus der Uteruswand. Infolgedessen entsteht eine kurze Narbe mit einer relativ großen Myometriumdicke und großer Stabilität. Das verfolgt das Ziel, die Inzidenzen einer Uterusruptur, Nahtdehiszenz oder Plazentationsstörung bei nachfolgenden Schwangerschaften zu minimieren. Während die komplette Uterusruptur nach einer klassischen bzw. Misgav-Ladach-Sectio selten ist (0,7% nach einer bzw. 0,9% nach mehrfachen Schnittverbindungen, siehe [19,20], scheint die Länge der Uterotomienarbe, wie sie ultrasonografisch nach einer Sectio-Entbindung gemessen wird, mit der Nahtdehiszenz bei der Geburt zu korrelieren. Es konnte gezeigt werden, dass bei kleinen Narben Nahtdehiszenzen bzw. Uterusrupturen in 5,3% gegenüber 42,9% bei großen Defekten auftreten [21]. Ob diese Nahttechnik für die Prävention einer Uterusruptur bei den nachfolgenden Schwangerschaften ausschlaggebend ist, wird sich erst nach längerer Nachbeobachtungszeit zeigen. Da an den Universitätsfrauenkliniken Novi Sad und Magdeburg bereits mehr als 7000 Kaiserschnitte mit der neuen Technik durchgeführt wurden, könnte dies als eine gute Basis zur Beantwortung der offenen Fragen dienen.

Bei der hier vorgestellten Sectio-Modifikation werden, im Gegensatz zu den anderen Sectio-Techniken, die Faszien- bzw. Hautinzision an den kindlichen führenden Teil durch stumpfes Hochschieben der vorderen und hinteren Uteruswunden angepasst. Das Kind wird durch einen dosierten Druck im Fundusbereich im wahrsten Sinne des Wortes „geboren“. Es ist vorstellbar, dass der Kompressionsdruck wie bei einer vaginalen Geburt für einen besseren Abtransport des Fruchtwassers durch die Lungengefäße sorgt. Ob respiratorische Anpassungsstörungen nach der hier beschriebenen Methode im Vergleich zur klassischen Sectio caesarea seltener auftreten, kann allerdings nur im Rahmen einer prospektiven Studie an einem definierten Patientenkollektiv gezeigt werden.

Die Fasziennaht wird analog zu den anderen Methoden fortlaufend durchgeführt. Dadurch, dass bei der Hautnaht die beiden Enden 2 cm offen gelassen werden, stellt diese Modifikation eine „natürliche Drainage“ und somit eine Prävention gegen Hämatom- und Serombildung dar. Dabei sind sehr gute kosmetische Ergebnisse zu verzeichnen, weil sich die zunächst offenen Wundränder nach wenigen Stunden verschließen und subkutan keine flüssigkeitsgefüllten Räume verbleiben.

## Fazit für die Praxis

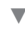

Die Sectio caesarea stellt die häufigste geburtshilfliche Operation dar. In Deutschland werden heute ca. ein Drittel aller Kinder per Sectio geboren. Schätzungsweise sind das jährlich über 200 000 Sectiones. Als Standardmethode gilt in Deutschland die „sanfte“ Sectio nach Misgav-Ladach. Die hier vorgestellten Modifikationen der Sectio-Technik betreffen die Positionierung und die Länge der Hautinzision, die Vermeidung von Stichverletzungen beim Kind durch das stumpfe Eingehen in den Uterus mit einer Pinzette und einen neuen Verschluss der Uteruswand. Durch diesen Verschluss sollen Komplikationen bei nachfolgenden Schwangerschaften reduziert werden. Die ersten, vielversprechenden Ergebnisse sollen im Rahmen von prospektiven Studien an einem definierten Patientenkollektiv beantwortet werden.

## Interessenkonflikte

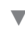

Die Autoren erklären, dass sie keine finanzielle Verbindungen mit einer für den Artikel relevanten Firma haben.

## Literatur

- 1 Keunen J, Hrsg. Der Kaiserschnitt. München: Elsevier, Urban & Fischer Verlag; 2008: 100–108
- 2 [http://www.destatis.de/jetspeed/portal/cms/Sites/destatis/Internet/DE/Presse/Pm/2011/03/PD11\\_\\_117\\_\\_231,templateld=renderPrint.psml](http://www.destatis.de/jetspeed/portal/cms/Sites/destatis/Internet/DE/Presse/Pm/2011/03/PD11__117__231,templateld=renderPrint.psml); Stand: 13.10.2011
- 3 Wacker J. Geburtshilfe. Kaiserschnitt vs. Natürliche Geburt. Geburtsh Frauenheilk 2010; 70: 840–843
- 4 Beckmann MW, Bader W, Bechtold I et al. Finanzierung und finanzielle Probleme von Leistungen und Strukturen im Fachgebiet Gynäkologie und Geburtshilfe im Jahr 2011 – allgemeine Aspekte und geburtshilfliche Versorgung. Geburtsh Frauenheilk 2011; 71: 367–380
- 5 Dudenhausen JW, Golic M, Kirschner R et al. Geburtsleitung bei dichorialen Zwillingen am Termin bei vorangehendem Zwilling in Schädel-lage – eine monozentrische retrospektive Kohortenstudie. Geburtsh Frauenheilk 2010; 70: 985–989
- 6 Hickl EJ. Wandlungen in der Kaiserschnittindikation. Gynäkol Geburtsh Rundschau 2002; 42: 15–18
- 7 Schlembach D. Pränatalmedizin. Intrauterine Wachstumsrestriktion – Diagnostik und Management. Geburtsh Frauenheilk 2012; 72: 373–375
- 8 Ladendorf B. Placenta percreta, Vasa praevia und Placenta praevia marginalis. Geburtsh Frauenheilk 2010; 70: A20
- 9 Welsch H, Wischnik A. Müttersterblichkeit. In: Schneider H, Hrsg. Die Geburtshilfe. 3. Aufl. Berlin: Springer Verlag; 2006: 1049–1063
- 10 Kunze M, Hart J, Lynch A et al. Intrapartales Management von Patientinnen mit vorzeitigem Blasensprung: maternales und fetales Outcome. Geburtsh Frauenheilk 2011; 71–V\_16
- 11 Pfannenstiel J. Über die Vorteile des surprasymphysären Faszienschnittes für die gynäkologischen Koliotomien, zugleich ein Beitrag zu der Indikationsstellung der Operationswege. Samml Klein Vortr Gynäkol 1900; 97: 68–98
- 12 Joel-Cohen SJ. Abdominal and vaginal hysterectomy. New techniques based on time and motion studies. London: William Heinemann Medical Books; 1972: 170
- 13 Stark M. Optimierte operative Methode. In: Stark M, Hrsg. Der Kaiserschnitt. München: Elsevier, Urban & Fischer Verlag; 2008: 160–176
- 14 Hofmeyer GJ, Mathai M, Shah A et al. Techniques for caesarean section. Cochrane Database Syst Rev 2008; 1: CD004662
- 15 Hofmeyer GJ, Novikova N, Mathai M et al. Techniques for caesarean section. Am J Obstet Gynecol 2009; 201: 431–444
- 16 Rasenack R, Schneider C, Jahnz E et al. Factors associated with the duration of breastfeeding in the Freiburg birth collective, Germany (Frei-Still). Geburtsh Frauenheilk 2012; 72: 64–69
- 17 Vejnović TR. Cesarean delivery – Vejnović modification. Srp Arh Celok Lek 2008; 136 (Suppl. 2): 109–115 (Serbian)
- 18 Doerfler H. 30 Jahre Schnittentbindung. Münch Med Wochenschr 1929; 1: 2–6

- 19 Lydon-Rochelle M, Holt VL, Easterling TR et al. Risk of uterine rupture during labor among women with a prior cesarean delivery. *N Engl J Med* 2001; 345: 3–8
- 20 Landon MB, Spong CY, Thom E et al. Risk of uterine rupture with a trial of labor in women with multiple and single prior cesarean delivery. *Obstet Gynecol* 2006; 108: 12–20
- 21 Vihareva Osseer O, Valentin L. Clinical importance of appearance of caesarean hysterotomy scar at transvaginal ultrasonography in nonpregnant women. *Obstet Gynecol* 2011; 117: 525–532
